# Supplementary material
Source: PubMed Central journal article supplement (PMC10260939)

## Supplementary Material

**Supplementary Table 1:** Demographic and clinical comorbidities of patients in the validation cohort. Cases include patients who developed AKI stage 2 or 3 during hospitalization. Controls include patients who developed AKI stage 1 or did not develop AKI during hospitalization.

| Characteristic                                            | Developed AKI (stage 2 or 3) during hospitalization (N = 35) | AKI stage 1 or no AKI during hospitalization (N = 226) | P Value |
|-----------------------------------------------------------|--------------------------------------------------------------|--------------------------------------------------------|---------|
| Age, mean (SD)                                            | 68.4 (17.1)                                                  | 70.2 (17.5)                                            | 0.534   |
| Male, n (%)                                               | 14 (40%)                                                     | 120 (53%)                                              | 0.203   |
| <b>Ancestry, n (%)</b>                                    |                                                              |                                                        | 0.341   |
| European                                                  | 22 (63%)                                                     | 151 (67%)                                              |         |
| East Asian                                                | 2 (6%)                                                       | 22 (10%)                                               |         |
| African                                                   | 5 (14%)                                                      | 27 (12%)                                               |         |
| South Asian                                               | 1 (3%)                                                       | 4(2%)                                                  |         |
| Mixed American                                            | 1 (3%)                                                       | 4(2%)                                                  |         |
| Unknown                                                   | 1 (3%)                                                       | 0 (0%)                                                 |         |
| Other                                                     | 3 (9%)                                                       | 18 (8%)                                                |         |
| <b>Comorbidities, n (%)</b>                               |                                                              |                                                        |         |
| Atrial Fibrillation                                       | 5 (14%)                                                      | 38 (17%)                                               | 0.811   |
| Coronary Artery Disease                                   | 9 (26%)                                                      | 32 (14%)                                               | 0.0859  |
| Arterial Hypertension                                     | 23 (66%)                                                     | 142 (63%)                                              | 0.851   |
| Diabetes                                                  | 15 (43%)                                                     | 77 (34%)                                               | 0.344   |
| Chronic Kidney Disease                                    | 10 (29%)                                                     | 25 (11%)                                               | 0.0130  |
| <b>Highest respiratory support, n (%)</b>                 |                                                              |                                                        | <0.001  |
| Intubation                                                | 17 (49%)                                                     | 30 (13%)                                               |         |
| Non-invasive ventilation (CPAP, BIPAP, high-flow cannula) | 3 (9%)                                                       | 23 (10%)                                               |         |
| Nasal cannula                                             | 5 (14%)                                                      | 94 (42%)                                               |         |
| None of the above                                         | 10 (29%)                                                     | 79 (35%)                                               |         |

**Supplementary Table 2:** Distribution of the number of SomaScan timepoints per person in the discovery cohort.

| <b>Number of SomaScan Time points</b> | <b>Number of patients</b> |
|---------------------------------------|---------------------------|
| 1                                     | 203                       |
| 2                                     | 137                       |
| 3                                     | 69                        |
| 4                                     | 30                        |
| 5                                     | 15                        |
| 6                                     | 1                         |
| 10                                    | 1                         |

## Supplementary Figure 1

Protein quantitative trait loci (pQTL) evidence for 62 AKI-associated proteins.

Associations were taken from proteomic and genomic data measured using human plasma samples.

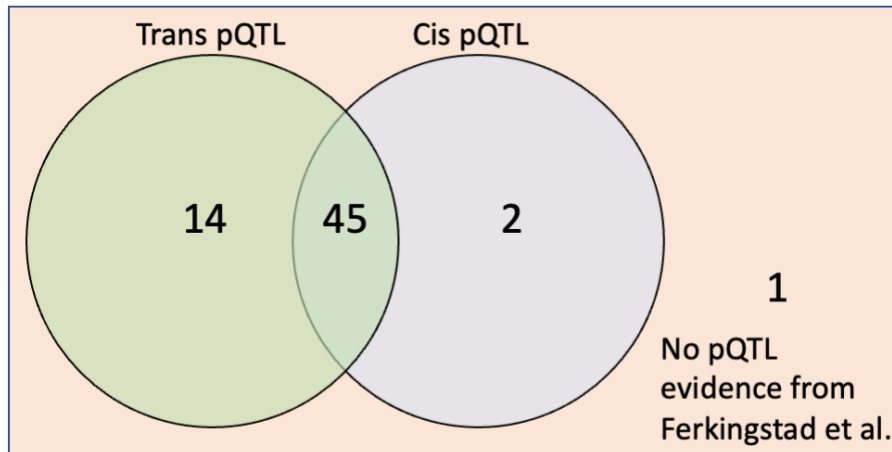

### Supplementary Figure 2

Distribution of number of days after discharge for the first and last post-discharge eGFR measurements. All measurements were extracted from the EHR as part of routine clinical care.

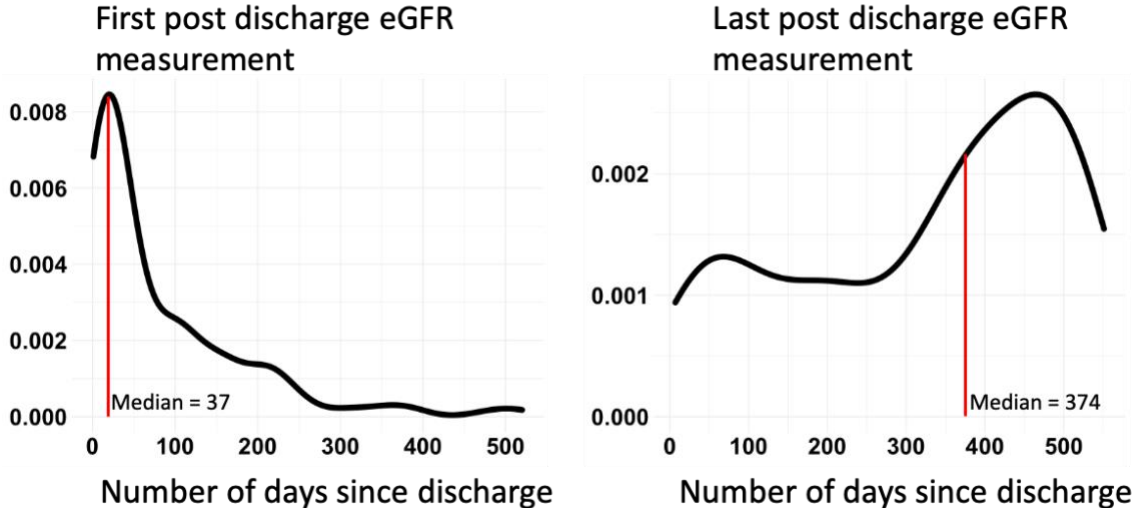

Supplement: 43856_2023_307_MOESM2_ESM.pdf [file 43856_2023_307_MOESM2_ESM.pdf]
