# Supplementary material
Source: PubMed Central journal article supplement (PMC10260939)
Supplement: 43856_2023_307_MOESM6_ESM.pdf [file 43856_2023_307_MOESM6_ESM.pdf]

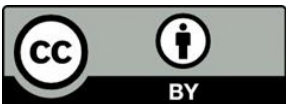

**Open Access** This file is licensed under a Creative Commons Attribution 4.0 International License, which permits use, sharing, adaptation, distribution and reproduction in any medium or format, as long as you give appropriate credit to the original author(s) and the source, provide a link to the Creative Commons license, and indicate if changes were made. In the cases where the authors are anonymous, such as is the case for the reports of anonymous peer reviewers, author attribution should be to 'Anonymous Referee' followed by a clear attribution to the source work. The images or other third party material in this file are included in the article's Creative Commons license, unless indicated otherwise in a credit line to the material. If material is not included in the article's Creative Commons license and your intended use is not permitted by statutory regulation or exceeds the permitted use, you will need to obtain permission directly from the copyright holder. To view a copy of this license, visit <http://creativecommons.org/licenses/by/4.0/>.

*This manuscript has been previously reviewed at another Nature Portfolio journal. This document only contains reviewer comments and rebuttal letters for versions considered at Communications Medicine. Mentions of the other journal have been redacted.*

REVIEWERS' COMMENTS:

Reviewer #1 (Remarks to the Author):

Authors have adressed further comments and questions. I have checked the similarity of the recent manuscript to that submitted to [redacted] before

Reviewer #4 (Remarks to the Author):

The authors now sufficiently acknowledge the limitation of the study and I do not have any further concerns. The paper clearly improved during the review process and I thank the authors for going through all this effort. Well done.

Reviewer #5 (Remarks to the Author):

The authors have addressed my concerns appropriately. I would like to highlight that the use of a hypergeometric test for assessing the replicability is not ideal though, because the significance may be (strongly) influenced by the correlation between the variables.

## REVIEWERS' COMMENTS:

### Reviewer #1 (Remarks to the Author).

1. Authors have addressed further comments and questions. I have checked the similarity of the recent manuscript to that submitted to [redacted] before

**Response.** The authors would like to thank the reviewer for their generous time and valuable inputs to make our manuscript better and improve the quality of our publication.

### Reviewer #4 (Remarks to the Author).

1. The authors now sufficiently acknowledge the limitation of the study and I do not have any further concerns. The paper clearly improved during the review process, and I thank the authors for going through all this effort. Well done.

**Response.** The authors would like to thank the reviewer for their generous time and valuable inputs to make our manuscript better and improve the quality of our publication.

### Reviewer #5 (Remarks to the Author).

1. The authors have addressed my concerns appropriately. I would like to highlight that the use of a hypergeometric test for assessing the replicability is not ideal though, because the significance may be (strongly) influenced by the correlation between the variables.

**Response.** The authors would like to thank the reviewer for their observations.

To address replicability, we conducted tests to measure agreement using Cohen's Kappa<sup>1</sup> metric. This kappa statistic showed a positive agreement (0.257) between the lists with 91% agreement result at a p-value <0.001.

In addition, we also conducted permutation testing using *CompareList* function from the *OrderedList* R package using 10000 permutations. We ran two instances of permutation testing ordering by p-value and log fold change. In both causes, we found significant (P <0.001) overlap.

| List comparison                       | ordered by p value           | Ordered by log fold change   |
|---------------------------------------|------------------------------|------------------------------|
| Assessing similarity of               | top ranks                    | top ranks                    |
| Length of lists                       | 4429                         | 4429                         |
| Number of random samples              | 10000                        | 10000                        |
| Lists are more alike in direct order  |                              |                              |
| Chosen regularization parameter       | alpha = 0.058<br>(200 genes) | alpha = 0.058<br>(200 genes) |
| Weighted overlap score                | 129.5                        | 177.1                        |
| Significance of similarity            | p-value < 0.001              | p-value < 0.001              |
| Score percentage for common entries   | 95                           | 95                           |
| Entries contributing score percentage | 50                           | 53                           |

Because of the comparable results between the permutation and hypergeometric testing for the significant proteins, we believe that that the results from these tests support our findings from the analysis as well.

## References.

- 1 McHugh, M. L. Interrater reliability: the kappa statistic. *Biochem Med (Zagreb)* **22**, 276-282 (2012).

## COMMENTS FROM REVIEWER 5

The problem I have tried to highlight with my comment is that the “hypergeometric test”, which tests for significance of the overlap of significant marker lists, is based on the assumption that these markers (e.g. proteins) are statistically independent from each other.

With proteins, this is not the case, because of their sometimes strong co-regulation, and the underlying co-expression networks. Therefore, it can (and does) happen that significant lists significantly overlap, because they relate to a set of highly correlated proteins.

To resolve this, one can permute the clinical outcome, and re-compute the list of P-values. This preserves the correlation structure between proteins, and the subsequent analysis of overlap will not be biased.

The authors did not address this in their revision, because it appears they performed permutation analysis directly on the list of P-values, which would not address the actual issue.

Despite this, it can be considered that the hypergeometric testing procedure is, although incorrect, relatively common practice, due to its simplicity. Unfortunately, it is difficult to judge how strong the bias is unless the overlap is very strong, which, however, I don't think it is. The description of significance is also not entirely consistent, as the authors state  $<0.05$  in the manuscript and  $<0.001$  in their first rebuttal letter.

I was also wondering where the procedure to assess this is actually described in the methods. Unfortunately, I was not able to find it.

Therefore, I am afraid, I could not with confidence say that the issue has been resolved completely.

COMMENTS: REVIEWER 5

The problem I have tried to highlight with my comment is that the “hypergeometric test”, which tests for significance of the overlap of significant marker lists, is based on the assumption that these markers (e.g. proteins) are statistically independent from each other.

With proteins, this is not the case, because of their sometimes strong co-regulation, and the underlying co-expression networks. Therefore, it can (and does) happen that significant lists significantly overlap, because they relate to a set of highly correlated proteins.

To resolve this, one can permute the clinical outcome, and re-compute the list of P-values. This preserves the correlation structure between proteins, and the subsequent analysis of overlap will not be biased.

The authors did not address this in their revision, because it appears they performed permutation analysis directly on the list of P-values, which would not address the actual issue.

Despite this, it can be considered that the hypergeometric testing procedure is, although incorrect, relatively common practice, due to its simplicity. Unfortunately, it is difficult to judge how strong the bias is unless the overlap is very strong, which, however, I don't think it is. The description of significance is also not entirely consistent, as the authors state <0.05 in the manuscript and <0.001 in their first rebuttal letter.

I was also wondering where the procedure to assess this is actually described in the methods. Unfortunately, I was not able to find it.

Therefore, I am afraid, I could not with confidence say that the issue has been resolved completely.

>> The authors thank the reviewer for their detailed suggestion to test our result. We now understand the request by the reviewer and have implemented “permutation testing analysis” for the confirmation of their significant genes on both, the discovery and validation cohorts. The authors performed the following steps for this analysis

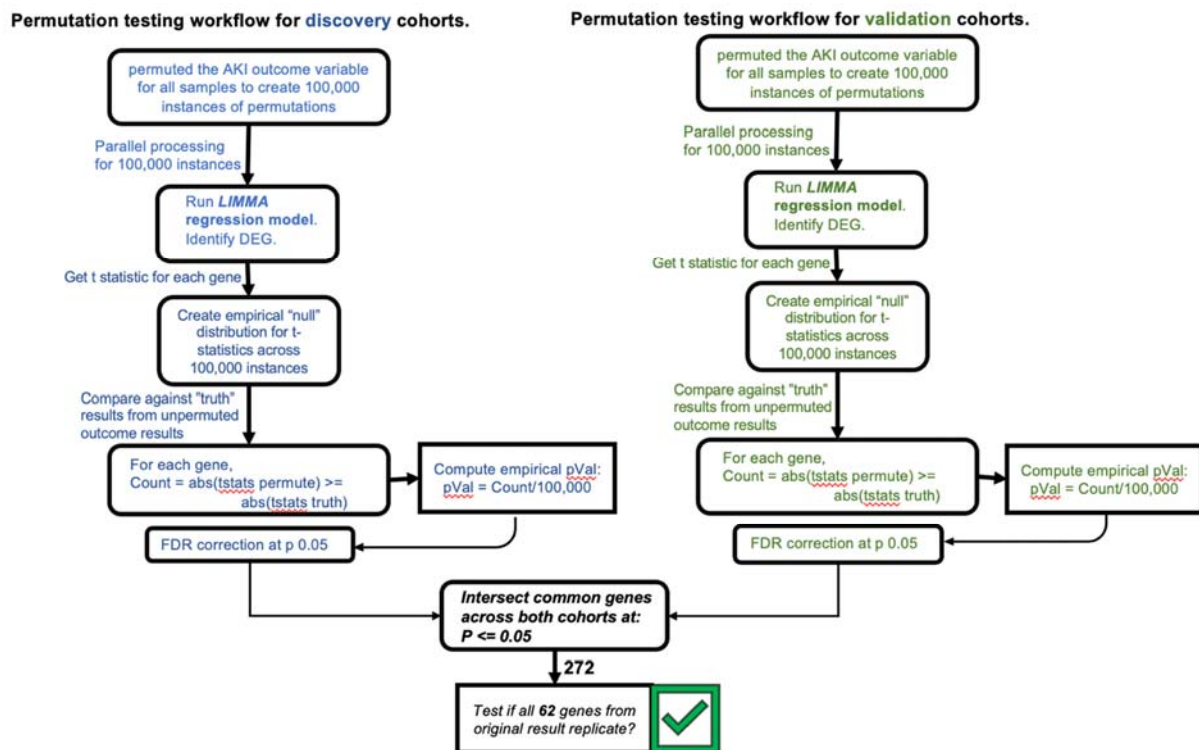

1. For the discovery and validation cohorts:
  - a. We permuted the AKI outcome variable for all samples to create 100000 instances of permutations.
  - b. For each instance:
    - i. We ran the limma regression model and identified differentially expressed genes using the permuted outcome.
  - c. For each gene, across 100000 instances, we created the empirical null distribution of t statistics
  - d. We then compared this empirical null distribution against the true AKI outcome variable to compute empirical P values defined as:
    - i. We identified the number of instances out of the 100,000 where the absolute value of the t statistics from the empirical null was greater than or equal to the t statistic value from the truth file.
  - e. Empirical P values were adjusted for multiple comparisons using the FDR.

**Results:**

2. **Intersecting the common genes between discovery and validation cohorts:**
  - a. We interested the DE genes from the discovery and validation cohorts and found 272 statistically significant genes.
  - b.
3. We found that all 62 genes identified in the original analysis were also had an empirical P value <0.05 after the permutation testing.

We have attached the results from our permutation testing that list the p-value and the FDR for each of the 62 genes for each cohort (table1 below).

In addition, we also performed hypergeometric test and measured the Cohen’s Kappa once again

**Results:** The hypergeometric test for overlap between the significant proteins in the validation and discovery cohorts was also significant (P = 2.133E-159). Additionally, the Cohen’s Kappa between the two protein lists based on P value was 0.501.

**Table1: Comparison of the p-values after permutation testing for the 62 genes.**

| Target         | UniProt | Entrez Gene Symbol | full gene name                              | Discovery Cohort |                       |       | Validation Cohort |                       |          |
|----------------|---------|--------------------|---------------------------------------------|------------------|-----------------------|-------|-------------------|-----------------------|----------|
|                |         |                    |                                             | tstats           | Count >= ground truth | P Val | tstats            | Count >= ground truth | P Val    |
| ALK-1          | P37023  | ACVRL1             | Serine/threonine-protein kinase receptor R3 | 12.72395606      | 0                     | 0     | 4.598939848       | 6                     | 6.00E-05 |
| Angiopoietin-2 | O15123  | ANGPT2             | Angiopoietin-2                              | 5.778974815      | 0                     | 0     | 2.714652605       | 738                   | 0.00738  |
| Apo F          | Q13790  | APOF               | Apolipoprotein F                            | 7.86380747       | 0                     | 0     | 3.993481888       | 18                    | 0.00018  |
| ASGR1          | P07306  | ASGR1              | Asialoglycoprotein receptor 1               | 7.441806725      | 0                     | 0     | 4.684083378       | 4                     | 4.00E-05 |



|                             |        |         |                                            |             |   |   |             |      |          |
|-----------------------------|--------|---------|--------------------------------------------|-------------|---|---|-------------|------|----------|
| ATOX1                       | O00244 | ATOX1   | Copper transport protein ATOX1             | 14.79760184 | 0 | 0 | 5.281096398 | 0    | 0        |
| BOLA1                       | Q9Y3E2 | BOLA1   | BolA-like protein 1                        | 12.16794545 | 0 | 0 | 5.297265907 | 0    | 0        |
| Carbonic anhydrase III      | P07451 | CA3     | Carbonic anhydrase 3                       | 7.578252754 | 0 | 0 | 3.203515231 | 186  | 0.00186  |
| CD59                        | P13987 | CD59    | CD59 glycoprotein                          | 9.899959182 | 0 | 0 | 4.820947452 | 0    | 0        |
| SCG1                        | P05060 | CHGB    | Secretogranin-1                            | 14.08173049 | 0 | 0 | 5.211742713 | 0    | 0        |
| COL                         | P04118 | CLPS    | Colipase                                   | 8.867440321 | 0 | 0 | 3.301937785 | 178  | 0.00178  |
| COSA1                       | Q2UY09 | COL28A1 | Collagen alpha-1(XXVIII) chain             | 13.36327142 | 0 | 0 | 5.670013394 | 0    | 0        |
| CPLX2                       | Q6PUV4 | CPLX2   | Complexin-2                                | 12.28690253 | 0 | 0 | 4.738531632 | 2    | 2.00E-05 |
| CRK                         | P46108 | CRK     | Adapter molecule crk                       | 8.973633925 | 0 | 0 | 4.176349475 | 1    | 1.00E-05 |
| Cystatin C                  | P01034 | CST3    | Cystatin-C                                 | 15.02757845 | 0 | 0 | 6.155259359 | 0    | 0        |
| CYTD                        | P28325 | CST5    | Cystatin-D                                 | 7.48454853  | 0 | 0 | 3.195215413 | 171  | 0.00171  |
| Chymotrypsin                | P17538 | CTRB1   | Chymotrypsinogen B                         | 6.163949729 | 0 | 0 | 4.155183319 | 9    | 9.00E-05 |
| ACBP                        | P07108 | DBI     | Acyl-CoA-binding protein                   | 15.73168536 | 0 | 0 | 5.350641282 | 0    | 0        |
| Discoidin domain receptor 2 | Q16832 | DDR2    | Discoidin domain-containing receptor 2     | 9.962324573 | 0 | 0 | 4.494363526 | 4    | 4.00E-05 |
| EGFL9                       | Q6UY11 | DLK2    | Protein delta homolog 2                    | 8.224380504 | 0 | 0 | 3.931254468 | 17   | 0.00017  |
| DJB12                       | Q9NXW2 | DNAJB12 | DnaJ homolog subfamily B member 12         | 8.656881472 | 0 | 0 | 3.825087274 | 17   | 0.00017  |
| DSC2                        | Q02487 | DSC2    | Desmocollin-2                              | 14.53045114 | 0 | 0 | 5.495867273 | 0    | 0        |
| EFNB1                       | P98172 | EFNB1   | Ephrin-B1                                  | 14.37502479 | 0 | 0 | 7.396864761 | 0    | 0        |
| EFNB2                       | P52799 | EFNB2   | Ephrin-B2                                  | 7.965874595 | 0 | 0 | 3.758587057 | 31   | 0.00031  |
| Epithelial cell kinase      | P29317 | EPHA2   | Ephrin type-A receptor 2                   | 10.04532675 | 0 | 0 | 5.105784226 | 1    | 1.00E-05 |
| FABP                        | P05413 | FABP3   | Fatty acid-binding protein, heart          | 9.973958285 | 0 | 0 | 3.936719921 | 14   | 0.00014  |
| SAP3                        | P17900 | GM2A    | Ganglioside GM2 activator                  | 14.7983567  | 0 | 0 | 6.989924786 | 0    | 0        |
| HDGF                        | P51858 | HDGF    | Hepatoma-derived growth factor             | 5.145341503 | 0 | 0 | 2.047193655 | 4259 | 0.04259  |
| TM149                       | Q9H665 | IGFLR1  | IGF-like family receptor 1                 | 11.37743904 | 0 | 0 | 3.906606358 | 11   | 0.00011  |
| IgG4, Kappa                 | P01861 | IGHG4   | Ig gamma-4, Kappa                          | 7.225380325 | 0 | 0 | 5.614906313 | 0    | 0        |
| Lipocalin 2                 | P80188 | LCN2    | Neutrophil gelatinase-associated lipocalin | 10.16756756 | 0 | 0 | 4.330712248 | 3    | 3.00E-05 |

|                      |        |          |                                                     |                 |   |             |                 |      |          |
|----------------------|--------|----------|-----------------------------------------------------|-----------------|---|-------------|-----------------|------|----------|
| Myoglobin            | P02144 | MB       | Myoglobin                                           | 10.42674<br>542 | 0 | 0           | 2.9988<br>25565 | 376  | 0.00376  |
| MXRA7                | P84157 | MXRA7    | Matrix-remodeling-associated protein 7              | 10.15403<br>388 | 0 | 0           | 6.0790<br>63804 | 0    | 0        |
| Myosin light chain 1 | P08590 | MYL3     | Myosin light chain 3                                | 8.235074<br>86  | 0 | 0           | 2.8351<br>85357 | 525  | 0.00525  |
| DAN                  | P41271 | NBL1     | Neuroblastoma suppressor of tumorigenicity 1        | 14.10672<br>958 | 0 | 0           | 6.7404<br>2808  | 0    | 0        |
| N-terminal pro-BNP   | P16860 | NPPB     | N-terminal pro-BNP                                  | 5.300911<br>758 | 0 | 0           | 2.2253<br>22217 | 2767 | 0.02767  |
| PCDGA                | Q9Y5H3 | PCDHGA10 | Protocadherin gamma-A10                             | 8.415558<br>273 | 0 | 0           | 3.7403<br>95269 | 47   | 0.00047  |
| PIANP                | Q8IYJ0 | PIANP    | PILR alpha-associated neural protein                | 10.88352<br>279 | 0 | 0           | 2.1592<br>96383 | 3158 | 0.03158  |
| LIPR1                | P54315 | PNLIPRP1 | Inactive pancreatic lipase-related protein 1        | 8.098872<br>905 | 0 | 0           | 3.5796<br>57094 | 47   | 0.00047  |
| Trypsin              | P07477 | PRSS1    | Trypsin-1                                           | 7.520788<br>226 | 0 | 0           | 3.8100<br>1249  | 25   | 0.00025  |
| Trypsin 2            | P07478 | PRSS2    | Trypsin-2                                           | 11.32386<br>081 | 0 | 0           | 5.2271<br>34613 | 1    | 1.00E-05 |
| TRY3                 | P35030 | PRSS3    | Trypsin-3                                           | 8.967646<br>529 | 0 | 0           | 4.8371<br>18072 | 0    | 0        |
| PTH                  | P01270 | PTH      | Parathyroid hormone                                 | 7.878645<br>874 | 0 | 0           | 3.5205<br>52176 | 66   | 0.00066  |
| PXDN                 | Q92626 | PXDN     | Peroxidasin homolog                                 | 13.41575<br>623 | 0 | 0           | 4.8475<br>4534  | 0    | 0        |
| PSP                  | P05451 | REG1A    | Lithostathine-1-alpha                               | 14.17458<br>715 | 0 | 0           | 5.2462<br>47684 | 1    | 1.00E-05 |
| PAP1                 | Q06141 | REG3A    | Regenerating islet-derived protein 3-alpha          | 11.24273<br>317 | 0 | 0           | 4.9084<br>67627 | 1    | 1.00E-05 |
| RNase 1              | P07998 | RNASE1   | Ribonuclease pancreatic                             | 14.35865<br>859 | 0 | 0           | 4.1252<br>90322 | 6    | 6.00E-05 |
| RNAS6                | Q93091 | RNASE6   | Ribonuclease K6                                     | 11.97576<br>266 | 0 | 0           | 3.9395<br>331   | 9    | 9.00E-05 |
| ROR2                 | Q01974 | ROR2     | Tyrosine-protein kinase transmembrane receptor ROR2 | 12.93705<br>739 | 0 | 0           | 3.9644<br>55547 | 20   | 2.00E-04 |
| SELW                 | P63302 | SEPW1    | Selenoprotein W                                     | 8.277672<br>661 | 0 | 0           | 3.4432<br>86183 | 79   | 0.00079  |
| ISK7                 | P58062 | SPINK7   | Serine protease inhibitor Kazal-type 7              | 9.072302<br>857 | 0 | 0           | 5.3149<br>38234 | 0    | 0        |
| Osteopontin          | P10451 | SPP1     | Osteopontin                                         | 9.928970<br>619 | 0 | 0           | 3.3955<br>87223 | 122  | 0.00122  |
| SRCA                 | Q86TD4 | SRL      | Sarcalumenin                                        | 14.21867<br>87  | 0 | 0           | 4.4331<br>93794 | 5    | 5.00E-05 |
| STMN3                | Q9NZ72 | STMN3    | Stathmin-3                                          | 5.909098<br>577 | 1 | 0.044<br>96 | 5.0231<br>11972 | 1    | 1.00E-05 |
| SUMO2                | P61956 | SUMO2    | Small ubiquitin-related modifier 2                  | 15.71934<br>188 | 0 | 0           | 4.1501<br>81565 | 4    | 4.00E-05 |

|                  |        |          |                                                      |                 |   |   |                 |     |          |
|------------------|--------|----------|------------------------------------------------------|-----------------|---|---|-----------------|-----|----------|
| TAGL             | Q01995 | TAGLN    | Transgelin                                           | 11.65964<br>555 | 0 | 0 | 4.8851<br>63211 | 0   | 0        |
| Trefoil factor 2 | Q03403 | TFF2     | Trefoil factor 2                                     | 8.487414<br>97  | 0 | 0 | 4.9048<br>98761 | 3   | 3.00E-05 |
| TFF3             | Q07654 | TFF3     | Trefoil factor 3                                     | 15.02572<br>999 | 0 | 0 | 4.4233<br>27069 | 5   | 5.00E-05 |
| TMEDA            | P49755 | TMED10   | Transmembrane emp24 domain-containing protein 10     | 15.24531<br>038 | 0 | 0 | 6.5152<br>30398 | 0   | 0        |
| TAJ              | Q9NS68 | TNFRSF19 | Tumor necrosis factor receptor superfamily member 19 | 13.14367<br>736 | 0 | 0 | 5.0150<br>33288 | 0   | 0        |
| TNF sR-I         | P19438 | TNFRSF1A | Tumor necrosis factor receptor superfamily member 1A | 9.946876<br>065 | 0 | 0 | 5.0151<br>46035 | 0   | 0        |
| Troponin T       | P45379 | TNNT2    | Troponin T, cardiac muscle                           | 11.49971<br>959 | 0 | 0 | 3.1976<br>61947 | 166 | 0.00166  |
| TITIN            | Q8WZ42 | TTN      | Titin                                                | 10.99864<br>194 | 0 | 0 | 4.9473<br>30952 | 3   | 3.00E-05 |

## REVIEWERS' COMMENTS:

Reviewer #5 (Remarks to the Author):

The authors have now implemented a permutation approach as part of their analysis workflow.

However, it appears the main issue of my concern has not been understood well.

The issue is that the \*overlap\* of the P-value lists of discovery and validation cohorts can arise by chance (e.g. if you have two relatively large lists of proteins with  $FDR < 0.05$ , and the overlap relates to a smaller, highly correlated set of proteins).

To test this, the permutation needs to target the overlap of the p-value lists, i.e. it would need to be tested in how many of the permutations, there is an overlap of at least 62 genes between the training and the validation data. It has to be considered though that when FDR control is part of the workflow, during permutation one is likely to observe a far lower number of significant proteins, and thus overlap. Instead, one would likely take the same number of top significant proteins as in the original analysis, and then test the overlap.

In any case, I would now suggest accepting as is, with the following modifications:

- add to the methods and results that FDR was performed on training and validation data with respect to all proteins measured
- modify the text of page 15 accordingly, which still states that the 62 proteins only show nominal significance in the validation data
- . state the overall number of significant proteins after FDR in the validation data

## REVIEWERS' COMMENTS:

Reviewer #5 (Remarks to the Author):

The authors have now implemented a permutation approach as part of their analysis workflow.

However, it appears the main issue of my concern has not been understood well.

The issue is that the \*overlap\* of the P-value lists of discovery and validation cohorts can arise by chance (e.g. if you have two relatively large lists of proteins with  $FDR < 0.05$ , and the overlap relates to a smaller, highly correlated set of proteins).

To test this, the permutation needs to target the overlap of the p-value lists, i.e. it would need to be tested in how many of the permutations, there is an overlap of at least 62 genes between the training and the validation data. It has to be considered though that when FDR control is part of the workflow, during permutation one is likely to observe a far lower number of significant proteins, and thus overlap. Instead, one would likely take the same number of top significant proteins as in the original analysis, and then test the overlap.

In any case, I would now suggest accepting as is, with the following modifications:

- add to the methods and results that FDR was performed on training and validation data with respect to all proteins measured
- modify the text of page 15 accordingly, which still states that the 62 proteins only show nominal significance in the validation data
- . state the overall number of significant proteins after FDR in the validation data

>> We thank the reviewer for their patience and their feedback through this session. We have made the suggested edits in the manuscript. The suggested line has been added to the **Methods and Results section**.

- a. - add to the methods and results that FDR was performed on training and validation data with respect to all proteins measured

## Differential expression analysis for prevalent AKI

Using data from the AKI cohort, log<sub>2</sub> transformed normalized protein values were modelled using multivariable linear regression in the Limma framework<sup>39</sup>. Models were adjusted for age, sex, history of chronic kidney disease (CKD), and supplemental oxygen requirement (0,1, or 2 [see above]) at the time of specimen collection. P-values were adjusted using the Benjamin-Hochberg procedure to control the false discovery rate (FDR) at 5%. FDR was performed on discovery and validation data with respect to all proteins measured.

## RESULTS

### Discovery and Validation Cohort Overview

To discover proteins associated with COVID-AKI, we enrolled a prospective cohort of patients hospitalized with COVID-19 admitted between March 24, 2020 and August 26, 2020 into a biobank as previously described<sup>34</sup>. Cases were defined as patients who developed AKI (stage 2 or 3) during their hospital admission and controls included all other patients (**Fig 1**). Characteristics of cases and controls in the discovery cohort are provided in **Supplementary Data 1 (sheet “Table 1”)**. Patients who developed AKI (stage 2 or 3) had a greater prevalence of diabetes (42% vs 22%,  $p < 0.001$ ), and chronic kidney disease (31% vs 5%,  $p < 0.001$ ) and more frequently required intubation (46% vs 11%,  $p < 0.001$ ). Patients who developed AKI (stage 2 or 3) also had a significantly lower minimum systolic blood pressure (104 vs 110,  $p < 0.001$ ), greater maximum pulse (106 vs 94,  $p < 0.001$ ), white blood cell count (12.9 vs 8.8,  $p < 0.001$ ), ferritin (2210 vs 1030  $p < 0.001$ ), and frequency of vasopressor use (48% vs 14%,  $p < 0.001$ ). We validated proteomic associations in an external cohort from Quebec, Canada. Characteristics of the validation cohort are provided in **Supplementary Table 1 (See**

**Supplementary Information).** In the validation cohort, compared to controls, AKI (stage 2 or 3) cases have a significantly higher prevalence of CKD (29% vs 11%,  $p = 0.01$ ) and a higher rate of intubation at the time of sample collection (49% vs 13%). **FDR was performed on discovery and validation data with respect to all proteins measured.**

- modify the text of page 15 accordingly, which still states that the 62 proteins only show nominal significance in the validation data

. state the overall number of significant proteins after FDR in the validation data

>> Thank you for the suggestions. We have made the following modifications:

### **Validation of AKI-associated proteins**

We then performed an external validation of AKI-associated proteins in a prospective biobank cohort from Quebec, Canada. **443 proteins in the discovery cohort are significantly associated with AKI (FDR adjusted  $P < 0.05$ ) while 71 proteins in the validation cohort are significantly associated with AKI ( $p < 0.05$ ). Of the proteins significantly associated with AKI in the discovery cohort, 62 are also associated with AKI in the validation cohort ( $p < 0.05$ , See Supplementary Data 1 (sheet "Table 2").** The hypergeometric test for overlap between the significant proteins in the validation and discovery cohorts was also significant ( $P = 2.133E-159$ ). Additionally, the Cohen's Kappa between the two protein lists based on P value was 0.501. **All validated proteins associate with an increased risk of AKI with nominal significance.** The correlation of fold changes of validated proteins in the discovery and validation cohort show a Pearson correlation score of 0.71 (**Fig 2b**). The 62-protein signature distinctly separate AKI cases from cohorts in the

discovery cohort (**Fig 2c**). To assess how many of our candidate proteins had orthogonal evidence for target specificity, we sought to identify how many of our proteins contained reported plasma protein quantitative trait loci (pQTL) associations from a recent publication by Ferkingstad *et al.* (Nat Genet, 2021). Of the 62 AKI associated proteins, 45 have both cis and trans pQTLs, 14 have only trans pQTLs, and 2 had cis pQTLs (**See Supplementary Figure 1, Supplementary Information**). Protein-protein interaction (PPI) network analysis reveal enrichment of several highly connected proteins, including LCN2 (alternative name: NGAL), REG3A, and MB (**Fig 4a**). The AKI-associated protein network also includes a cluster of cardiac structural proteins (**Fig 4b**), TNNT2, TTN, MYL3, SRL, and NPPB (alternative name: BNP).
